# Supplementary material for: Tuning iteration space slicing based tiled multi-core code implementing Nussinov’s RNA folding
Source: Springer Nature journal article supplement (doi:10.1186/s12859-018-2008-6), 2018-01-15
Supplement: 12859_2018_2008_MOESM2_ESM.pdf [file 12859_2018_2008_MOESM2_ESM.pdf]

### Construction of parallel parametric 3-D tiled code implementing Nussinov's algorithm using the two nonparametric codes.

---

```

1 // 23, 47, 113    first nonparametric tiled code, violet lines
2 // 37, 79, 167   second nonparametric tiled code, red lines
3 // b1, b2, b3    target parameteric tiled code, black lines
4 for( c1 = 0; c1 <= floord(70 * N - 93, 1081); c1 += 1)
5 for( c1 = 0; c1 <= floord(116 * N - 153, 2923); c1 += 1)
6 for( c1 = 0; c1 <= floord((b1+b2) * N - (2*b1+b2), b1*b2); c1 += 1)
7 #pragma omp parallel for // code without differences, green lines
8 for( c3 = max(0, c1 - (N + 22) / 23 + 1); c3 <= min((N - 2) / 47, (23 * c1 + 21) / 70); c3 += 1)
9 for( c3 = max(0, c1 - (N + 36) / 37 + 1); c3 <= min((N - 2) / 79, (37 * c1 + 35) / 116); c3 += 1)
10 for( c3 = max(0, c1 - (N + b1-1) / b1 + 1); c3 <= min((N - 2)/b2, (b1 * c1 + b1-2) / (b1+b2)); c3+=1)
11 for( c4 = 0; c4 <= 1; c4 += 1) {
12     if (c4 == 1) {
13         for( c7 = max(-N + 23 * c1 - 23 * c3 + 1, -N + 47 * c3 + 2); c7 <= min(0, -N + 23 * c1 - 23 * ↵
14             ↵ c3 + 23); c7 += 1)
15         for( c7 = max(-N + 37 * c1 - 37 * c3 + 1, -N + 79 * c3 + 2); c7 <= min(0, -N + 37 * c1 - 37 * ↵
16             ↵ c3 + 37); c7 += 1)
17         for( c7 = max(-N + b1 * c1 - b1 * c3 + 1, -N + b2 * c3 + 2); c7 <= min(0, -N + b1 * c1 - b1 * ↵
18             ↵ c3 + b1); c7 += 1)
19         for( c9 = 47 * c3 - c7 + 1; c9 <= min(N - 1, 47 * c3 - c7 + 47); c9 += 1)
20         for( c9 = 79 * c3 - c7 + 1; c9 <= min(N - 1, 79 * c3 - c7 + 79); c9 += 1)
21         for( c9 = b2 * c3 - c7 + 1; c9 <= min(N - 1, b2 * c3 - c7 + b2); c9 += 1)
22         for( c10 = max(0, 47 * c3 - c7 - c9 + 2); c10 <= 1; c10 += 1) {
23             for( c10 = max(0, 79 * c3 - c7 - c9 + 2); c10 <= 1; c10 += 1) {
24                 for( c10 = max(0, b2 * c3 - c7 - c9 + 2); c10 <= 1; c10 += 1) {
25                     if (c10 == 1) {
26                         S[(-c7)][c9] = MAX(S[(-c7)][c9], S[(-c7)+1][c9-1] + sigma(-c7,c9));
27                     } else {
28                         if (N + 23 * c3 + c7 >= 23 * c1 + 2)
29                         if (N + 37 * c3 + c7 >= 37 * c1 + 2)
30                         if (N + b1 * c3 + c7 >= b1 * c1 + 2)
31                             for( c11 = 0; c11 <= 47 * c3; c11 += 1)
32                             for( c11 = 0; c11 <= 79 * c3; c11 += 1)
33                             for( c11 = 0; c11 <= b2 * c3; c11 += 1)
34                                 S[(-c7)][c9] = MAX(S[(-c7)][c11+(-c7)] + S[c11+(-c7)+1][c9], S[(-c7)][c9]);
35                                 S[(-c7)][c9] = MAX(S[(-c7)][c11+(-c7)] + S[c11+(-c7)+1][c9], S[(-c7)][c9]);
36                     } }
37                 } else
38                 for( c5 = 0; c5 <= 47 * c3 / 113; c5 += 1)
39                 for( c5 = 0; c5 <= 79 * c3 / 167; c5 += 1)
40                 for( c5 = 0; c5 <= b2 * c3/ b3; c5 += 1)
41                 for( c7 = max(-N + 23 * c1 - 23 * c3 + 1, -N + 47 * c3 + 2); c7 <= min(0, -N + 23 * c1 - 23 ↵
42                     ↵ c3 + 23); c7 += 1) {
43                 for( c7 = max(-N + 37 * c1 - 37 * c3 + 1, -N + 79 * c3 + 2); c7 <= min(0, -N + 37 * c1 - 37 ↵
44                     ↵ c3 + 37); c7 += 1) {
45                 for( c7 = max(-N + b1 * c1 - b1 * c3 + 1, -N + b2 * c3 + 2); c7 <= min(0, -N + b1 * c1 - b1 ↵
46                     ↵ c3 + b1); c7 += 1) {
47                     if (N + 23 * c3 + c7 >= 23 * c1 + 2) {
48                     if (N + 37 * c3 + c7 >= 37 * c1 + 2) {
49                     if (N + b1 * c3 + c7 >= b1 * c1 + 2) {
50                         for( c11 = 113 * c5; c11 <= min(47 * c3, 113 * c5 + 112); c11 += 1)
51                         for( c11 = 167 * c5; c11 <= min(79 * c3, 167 * c5 + 166); c11 += 1)
52                         for( c11 = b3 * c5; c11 <= min(b2 * c3, b3 * c5 + b3-1); c11 += 1)
53                             S[(-c7)][(47*c3-c7+1)] = MAX(S[(-c7)][c11+(-c7)] + S[c11+(-c7)+1][(47*c3-c7+1)], ↵
54                             ↵ S[(-c7)][(47*c3-c7+1)]);
55                             S[(-c7)][(79*c3-c7+1)] = MAX(S[(-c7)][c11+(-c7)] + S[c11+(-c7)+1][(79*c3-c7+1)], ↵
56                             ↵ S[(-c7)][(79*c3-c7+1)]);
57                             S[(-c7)][(b2*c3-c7+1)] = MAX(S[(-c7)][c11+(-c7)] + S[c11+(-c7)+1][(b2*c3-c7+1)], ↵
58                             ↵ S[(-c7)][(b2*c3-c7+1)]);
59                     } } }
60                 } else
61                 for( c9 = N - 23 * c1 + 70 * c3; c9 <= min(N - 1, N - 23 * c1 + 70 * c3 + 46); c9 += 1)
62                 for( c9 = N - 37 * c1 + 116 * c3; c9 <= min(N - 1, N - 37 * c1 + 116 * c3 + 78); c9 += 1)
63                 for( c9 = N - b1 * c1 + (b1+b2) * c3; c9 <= min(N - 1, N - b1 * c1 + (b1+b2) * c3 + ↵
64                     ↵ b2-1); c9 += 1)
65                 for( c11 = 113 * c5; c11 <= min(47 * c3, 113 * c5 + 112); c11 += 1)
66                 for( c11 = 167 * c5; c11 <= min(79 * c3, 167 * c5 + 166); c11 += 1)
67                 for( c11 = b3 * c5; c11 <= min(b2 * c3, b3 * c5 + b3-1); c11 += 1)
68                     S[(N-23*c1+23*c3-1)][c9] = MAX(S[(N-23*c1+23*c3-1)][c11+(N-23*c1+23*c3-1)] + ↵
69                     ↵ S[c11+(N-23*c1+23*c3-1)+1][c9], S[(N-23*c1+23*c3-1)][c9]);
70                     S[(N-37*c1+37*c3-1)][c9] = MAX(S[(N-37*c1+37*c3-1)][c11+(N-37*c1+37*c3-1)] + ↵
71                     ↵ S[c11+(N-37*c1+37*c3-1)+1][c9], S[(N-37*c1+37*c3-1)][c9]);
72                     S[(N-b1*c1+b1*c3-1)][c9] = MAX(S[(N-b1*c1+b1*c3-1)][c11+(N-b1*c1+b1*c3-1)] + ↵
73                     ↵ S[c11+(N-b1*c1+b1*c3-1)+1][c9], S[(N-b1*c1+b1*c3-1)][c9]);
74             } }
75     } }

```

---
